# Supplementary material for: Multisystem inflammatory syndrome in children and COVID-19 are distinct presentations of SARS–CoV-2
Source: JCI journal article supplement (doi:10.1172/jci140970), 2020-07-30
Supplement: sd2 [file 2]

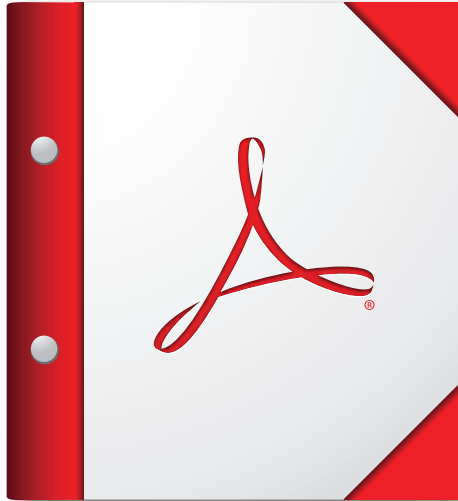

**For the best experience, open this PDF portfolio in  
Acrobat X or Adobe Reader X, or later.**

**Get Adobe Reader Now!**
